# Supplementary material
Source: Royal Society of Chemistry journal article supplement (doi:10.1039/d6dt00783j)
Supplement: d6dt00783j1.pdf [file d6dt00783j1.pdf]

## Supporting Information

# Design of Borate-Squarate Hybrid Crystals with Large Birefringence by Synergistic Assembly of Planar $\pi$ -Conjugated Groups

Haowen Li,<sup>ac</sup> Xiao Wang,<sup>bc</sup> Hui Chai<sup>\*a</sup> and Fangfang Zhang<sup>\*ac</sup>

<sup>a</sup> State Key Laboratory of Chemistry and Utilization of Carbon Based Energy Resources, College of Chemistry, Xinjiang University, Urumqi 830017, China.

<sup>b</sup> College of Materials Science and Engineering, Xinjiang University, Urumqi 830017, China.

<sup>c</sup> Research Center for Crystal Materials; CAS Key Laboratory of Functional Materials and Devices for Special Environmental Conditions; Xinjiang Key Laboratory of Functional Crystal Materials; Xinjiang Technical Institute of Physics and Chemistry, CAS, 40-1 South Beijing Road, Urumqi 830011, China.

\* Corresponding authors: hchchh@sina.com; ffzhang@ms.xjb.ac.cn

## CONTENTS

- Table S1.** Crystallographic data and structure refinement parameters for  $\text{Rb}_2(\text{C}_4\text{O}_4)[\text{B}(\text{OH})_3]_2 \cdot 2\text{H}_2\text{O}$ ,  $\text{Cs}_2(\text{C}_4\text{O}_4)[\text{B}(\text{OH})_3]_2 \cdot 2\text{H}_2\text{O}$ , and  $\text{Rb}(\text{C}_4\text{O}_4)_{0.5} \cdot \text{B}(\text{OH})_3$ .
- Table S2.** Atomic coordinates and equivalent isotropic displacement parameters ( $\text{\AA}^2$ ) for  $\text{Rb}_2(\text{C}_4\text{O}_4)[\text{B}(\text{OH})_3]_2 \cdot 2\text{H}_2\text{O}$ ,  $\text{Cs}_2(\text{C}_4\text{O}_4)[\text{B}(\text{OH})_3]_2 \cdot 2\text{H}_2\text{O}$ , and  $\text{Rb}(\text{C}_4\text{O}_4)_{0.5} \cdot \text{B}(\text{OH})_3$ .  $U(\text{eq})$  is defined as one-third of the trace of the orthogonalized  $U_{ij}$  tensor.
- Table S3.** Selected bond lengths ( $\text{\AA}$ ) and angles ( $^\circ$ ) for  $\text{Rb}_2(\text{C}_4\text{O}_4)[\text{B}(\text{OH})_3]_2 \cdot 2\text{H}_2\text{O}$ .
- Table S4.** Selected bond lengths ( $\text{\AA}$ ) and angles ( $^\circ$ ) for  $\text{Cs}_2(\text{C}_4\text{O}_4)[\text{B}(\text{OH})_3]_2 \cdot 2\text{H}_2\text{O}$ .
- Table S5.** Selected bond lengths ( $\text{\AA}$ ) and angles ( $^\circ$ ) for  $\text{Rb}(\text{C}_4\text{O}_4)_{0.5} \cdot \text{B}(\text{OH})_3$ .
- Table S6.** Studies on reported borate-squarates.
- Table S7.** The assignments of the infrared absorption peaks for  $\text{Rb}_2(\text{C}_4\text{O}_4)[\text{B}(\text{OH})_3]_2 \cdot 2\text{H}_2\text{O}$ ,  $\text{Cs}_2(\text{C}_4\text{O}_4)[\text{B}(\text{OH})_3]_2 \cdot 2\text{H}_2\text{O}$ , and  $\text{Rb}(\text{C}_4\text{O}_4)_{0.5} \cdot \text{B}(\text{OH})_3$ .
- Figure S1.** Powder XRD patterns of  $\text{Rb}_2(\text{C}_4\text{O}_4)[\text{B}(\text{OH})_3]_2 \cdot 2\text{H}_2\text{O}$  (a),  $\text{Cs}_2(\text{C}_4\text{O}_4)[\text{B}(\text{OH})_3]_2 \cdot 2\text{H}_2\text{O}$  (b), and  $\text{Rb}(\text{C}_4\text{O}_4)_{0.5} \cdot \text{B}(\text{OH})_3$  (c).
- Figure S2.** (a) View of asymmetric unit of  $\text{Rb}_2(\text{C}_4\text{O}_4)[\text{B}(\text{OH})_3]_2 \cdot 2\text{H}_2\text{O}$ ; The coordination of Rb1 (b) and Rb2 (c) atoms in  $\text{Rb}_2(\text{C}_4\text{O}_4)[\text{B}(\text{OH})_3]_2 \cdot 2\text{H}_2\text{O}$ .
- Figure S3.** The one-dimensional  $[\text{Rb}-\text{O}]_\infty$  polyhedral chains in  $\text{Rb}_2(\text{C}_4\text{O}_4)[\text{B}(\text{OH})_3]_2 \cdot 2\text{H}_2\text{O}$ .
- Figure S4.** Powder XRD patterns of calcined polycrystalline samples of  $\text{Rb}_2(\text{C}_4\text{O}_4)[\text{B}(\text{OH})_3]_2 \cdot 2\text{H}_2\text{O}$  (a) and  $\text{Cs}_2(\text{C}_4\text{O}_4)[\text{B}(\text{OH})_3]_2 \cdot 2\text{H}_2\text{O}$  (b).
- Figure S5.** FT-IR spectra of  $\text{Rb}_2(\text{C}_4\text{O}_4)[\text{B}(\text{OH})_3]_2 \cdot 2\text{H}_2\text{O}$  (a),  $\text{Cs}_2(\text{C}_4\text{O}_4)[\text{B}(\text{OH})_3]_2 \cdot 2\text{H}_2\text{O}$  (b), and  $\text{Rb}(\text{C}_4\text{O}_4)_{0.5} \cdot \text{B}(\text{OH})_3$  (c).

**Table S1.** Crystallographic data and structure refinement parameters for  $\text{Rb}_2(\text{C}_4\text{O}_4)[\text{B}(\text{OH})_3]_2 \cdot 2\text{H}_2\text{O}$ ,  $\text{Cs}_2(\text{C}_4\text{O}_4)[\text{B}(\text{OH})_3]_2 \cdot 2\text{H}_2\text{O}$ , and  $\text{Rb}(\text{C}_4\text{O}_4)_{0.5} \cdot \text{B}(\text{OH})_3$ .

| Empirical formula                                    | $\text{Rb}_2(\text{C}_4\text{O}_4)[\text{B}(\text{OH})_3]_2 \cdot 2\text{H}_2\text{O}$ | $\text{Cs}_2(\text{C}_4\text{O}_4)[\text{B}(\text{OH})_3]_2 \cdot 2\text{H}_2\text{O}$ | $\text{Rb}(\text{C}_4\text{O}_4)_{0.5} \cdot \text{B}(\text{OH})_3$ |
|------------------------------------------------------|----------------------------------------------------------------------------------------|----------------------------------------------------------------------------------------|---------------------------------------------------------------------|
| CCDC number                                          | 2535144                                                                                | 2535145                                                                                | 2535146                                                             |
| Formula weight                                       | 442.68                                                                                 | 537.56                                                                                 | 203.32                                                              |
| Temperature/K                                        | 298                                                                                    |                                                                                        |                                                                     |
| Crystal system                                       | orthorhombic                                                                           |                                                                                        | monoclinic                                                          |
| Space group                                          | $Pca2_1$                                                                               |                                                                                        | $C2/m$                                                              |
| a/Å                                                  | 16.2257(10)                                                                            | 16.4512(6)                                                                             | 11.591(2)                                                           |
| b/Å                                                  | 6.7803(4)                                                                              | 7.0876(2)                                                                              | 7.3534(12)                                                          |
| c/Å                                                  | 12.2028(9)                                                                             | 12.3802(4)                                                                             | 8.4758(16)                                                          |
| $\beta/^\circ$                                       | 90                                                                                     | 90                                                                                     | 123.365(6)                                                          |
| Volume/Å <sup>3</sup>                                | 1342.49(15)                                                                            | 1443.53(8)                                                                             | 603.36(19)                                                          |
| Z                                                    | 4                                                                                      |                                                                                        |                                                                     |
| $\rho_{\text{calc}}/\text{g} \cdot \text{cm}^{-3}$   | 2.190                                                                                  | 2.473                                                                                  | 2.238                                                               |
| $\mu/\text{mm}^{-1}$                                 | 7.346                                                                                  | 5.103                                                                                  | 8.150                                                               |
| F(000)                                               | 856                                                                                    | 1000.0                                                                                 | 388                                                                 |
| Radiation                                            | MoK $\alpha$ ( $\lambda = 0.71073$ )                                                   |                                                                                        |                                                                     |
| 2 $\theta$ range for data collection/ $^\circ$       | 6.008 to 54.986                                                                        | 5.748 to 54.976                                                                        | 5.756 to 55.036                                                     |
| Index ranges                                         | $-20 \leq h \leq 21, -8 \leq k \leq 8, -15 \leq l \leq 15$                             | $-21 \leq h \leq 20, -8 \leq k \leq 9, -15 \leq l \leq 16$                             | $-14 \leq h \leq 14, -9 \leq k \leq 9, -11 \leq l \leq 10$          |
| Independent reflections                              | 3056 [ $R_{\text{int}} = 0.0783, R_{\text{sigma}} = 0.0582$ ]                          | 3303 [ $R_{\text{int}} = 0.0538, R_{\text{sigma}} = 0.0291$ ]                          | 751 [ $R_{\text{int}} = 0.0682, R_{\text{sigma}} = 0.0362$ ]        |
| Completeness to theta                                | 99.9%                                                                                  | 99.9%                                                                                  | 100%                                                                |
| Data/restraints/parameters                           | 3056/1/193                                                                             | 3303/1/199                                                                             | 751/1/64                                                            |
| Goodness-of-fit on F <sup>2</sup>                    | 0.910                                                                                  | 1.012                                                                                  | 1.038                                                               |
| Final R indexes [ $I \geq 2\sigma(I)$ ] <sup>a</sup> | $R_1 = 0.0264, wR_2 = 0.0468$                                                          | $R_1 = 0.0170, wR_2 = 0.0350$                                                          | $R_1 = 0.0270, wR_2 = 0.0508$                                       |
| Final R indexes [all data] <sup>a</sup>              | $R_1 = 0.0396, wR_2 = 0.0497$                                                          | $R_1 = 0.0212, wR_2 = 0.0359$                                                          | $R_1 = 0.0442, wR_2 = 0.0558$                                       |
| Largest diff. peak/hole / e Å <sup>-3</sup>          | 0.32/-0.33                                                                             | 1.10/-0.36                                                                             | 0.38/-0.41                                                          |
| Flack parameter                                      | 0.016(9)                                                                               | 0.009(12)                                                                              | /                                                                   |

$$^a R_1 = \frac{\sum ||F_o| - |F_c||}{\sum |F_o|}, wR_2 = \frac{[\sum w(F_o^2 - F_c^2)^2 / \sum w(F_o^2)^2]^{1/2}}$$

**Table S2.** Atomic coordinates and equivalent isotropic displacement parameters ( $\text{\AA}^2$ ) for  $\text{Rb}_2(\text{C}_4\text{O}_4)[\text{B}(\text{OH})_3]_2 \cdot 2\text{H}_2\text{O}$ ,  $\text{Cs}_2(\text{C}_4\text{O}_4)[\text{B}(\text{OH})_3]_2 \cdot 2\text{H}_2\text{O}$ , and  $\text{Rb}(\text{C}_4\text{O}_4)_{0.5} \cdot \text{B}(\text{OH})_3$ .  $U(\text{eq})$  is defined as one-third of the trace of the orthogonalized  $U_{ij}$  tensor.

| Atom                                                                                                     | <i>X</i>    | <i>y</i>   | <i>z</i>   | <i>U</i> (eq) |
|----------------------------------------------------------------------------------------------------------|-------------|------------|------------|---------------|
| <b><math>\text{Rb}_2(\text{C}_4\text{O}_4)[\text{B}(\text{OH})_3]_2 \cdot 2\text{H}_2\text{O}</math></b> |             |            |            |               |
| Rb1                                                                                                      | 0.73167(2)  | 0.94247(7) | 0.47950(6) | 0.03265(12)   |
| Rb2                                                                                                      | 0.79499(3)  | 0.58764(7) | 0.73077(6) | 0.04044(14)   |
| B1                                                                                                       | 0.5922(3)   | 0.2550(9)  | 0.6691(5)  | 0.0247(13)    |
| B2                                                                                                       | 0.9206(4)   | 0.7562(10) | 0.4266(5)  | 0.0283(14)    |
| C1                                                                                                       | 0.5250(3)   | 0.7535(7)  | 0.4710(5)  | 0.0256(10)    |
| C2                                                                                                       | 0.5497(3)   | 0.7518(9)  | 0.5864(4)  | 0.0264(13)    |
| C3                                                                                                       | 0.4630(3)   | 0.7379(8)  | 0.6192(4)  | 0.0251(11)    |
| C4                                                                                                       | 0.4391(3)   | 0.7421(7)  | 0.5049(4)  | 0.0254(12)    |
| O1                                                                                                       | 0.7101(2)   | 1.0106(5)  | 0.2305(5)  | 0.0456(9)     |
| O2                                                                                                       | 0.7339(2)   | 0.5124(5)  | 0.4705(8)  | 0.0504(13)    |
| O3                                                                                                       | 0.6179(2)   | 0.2549(6)  | 0.5607(3)  | 0.0325(9)     |
| O4                                                                                                       | 0.6537(2)   | 0.2684(5)  | 0.7437(3)  | 0.0325(8)     |
| O5                                                                                                       | 0.5107(2)   | 0.2427(8)  | 0.6899(3)  | 0.0378(10)    |
| O6                                                                                                       | 0.8616(2)   | 0.7662(8)  | 0.3480(4)  | 0.0391(10)    |
| O7                                                                                                       | 1.0031(2)   | 0.7401(7)  | 0.4057(3)  | 0.0391(10)    |
| O8                                                                                                       | 0.8940(2)   | 0.7627(7)  | 0.5318(3)  | 0.0354(10)    |
| O9                                                                                                       | 0.5627(2)   | 0.7629(8)  | 0.3818(3)  | 0.0356(10)    |
| O10                                                                                                      | 0.6168(2)   | 0.7605(7)  | 0.6364(3)  | 0.0376(10)    |
| O11                                                                                                      | 0.4253(2)   | 0.7285(5)  | 0.7093(3)  | 0.0311(9)     |
| O12                                                                                                      | 0.3705(2)   | 0.7404(6)  | 0.4558(3)  | 0.0362(10)    |
| <b><math>\text{Cs}_2(\text{C}_4\text{O}_4)[\text{B}(\text{OH})_3]_2 \cdot 2\text{H}_2\text{O}</math></b> |             |            |            |               |
| Cs1                                                                                                      | 0.77057(2)  | 0.46685(4) | 0.52410(3) | 0.03442(8)    |
| Cs2                                                                                                      | 0.20420(2)  | 0.89374(4) | 0.27163(3) | 0.03790(8)    |
| B1                                                                                                       | 0.9101(3)   | 0.7774(8)  | 0.3272(4)  | 0.0301(11)    |
| B2                                                                                                       | 0.5732(4)   | 0.2696(9)  | 0.5760(5)  | 0.0330(12)    |
| C1                                                                                                       | 0.5616(3)   | 0.7700(6)  | 0.4938(3)  | 0.0279(10)    |
| C2                                                                                                       | 0.5382(3)   | 0.7643(7)  | 0.3809(4)  | 0.0279(9)     |
| C3                                                                                                       | 0.4527(3)   | 0.7439(7)  | 0.4122(4)  | 0.0296(10)    |
| C4                                                                                                       | 0.4765(2)   | 0.7499(6)  | 0.5270(5)  | 0.0297(8)     |
| O1                                                                                                       | 0.7138(2)   | 0.5464(5)  | 0.2776(5)  | 0.0464(8)     |
| O2                                                                                                       | 0.76466(16) | 0.0228(4)  | 0.5251(6)  | 0.0383(7)     |
| O3                                                                                                       | 0.6004(2)   | 0.2823(7)  | 0.4717(3)  | 0.0440(10)    |
| O4                                                                                                       | 0.4933(2)   | 0.2389(6)  | 0.5944(3)  | 0.0441(9)     |
| O5                                                                                                       | 0.6309(2)   | 0.2890(7)  | 0.6529(3)  | 0.0484(10)    |
| O6                                                                                                       | 0.99057(19) | 0.7581(7)  | 0.3071(3)  | 0.0420(9)     |
| O7                                                                                                       | 0.88458(18) | 0.7887(6)  | 0.4340(3)  | 0.0366(8)     |

|                                                                       |             |            |           |            |
|-----------------------------------------------------------------------|-------------|------------|-----------|------------|
| O8                                                                    | 0.85033(18) | 0.7902(5)  | 0.2530(3) | 0.0383(8)  |
| O9                                                                    | 0.62844(18) | 0.7849(5)  | 0.5433(3) | 0.0386(8)  |
| O10                                                                   | 0.57499(18) | 0.7733(5)  | 0.2921(3) | 0.0355(8)  |
| O11                                                                   | 0.3875(2)   | 0.7266(7)  | 0.3626(3) | 0.0453(10) |
| O12                                                                   | 0.4407(2)   | 0.7389(6)  | 0.6146(3) | 0.0409(10) |
| <b>Rb(C<sub>4</sub>O<sub>4</sub>)<sub>0.5</sub>·B(OH)<sub>3</sub></b> |             |            |           |            |
| Rb1                                                                   | 0.500000    | 0.75829(5) | 0.500000  | 0.0390(2)  |
| B1                                                                    | 0.1642(5)   | 0.500000   | 0.2638(6) | 0.0313(11) |
| C1                                                                    | 0.6000(4)   | 0.500000   | 0.1172(5) | 0.0269(9)  |
| C2                                                                    | 0.4634(4)   | 0.500000   | 0.0862(5) | 0.0279(9)  |
| O1                                                                    | 0.0442(3)   | 0.500000   | 0.2560(4) | 0.0370(8)  |
| O2                                                                    | 0.1650(3)   | 0.500000   | 0.1039(4) | 0.0445(9)  |
| O3                                                                    | 0.2877(3)   | 0.500000   | 0.4344(4) | 0.0390(8)  |
| O4                                                                    | 0.4202(3)   | 0.500000   | 0.1932(4) | 0.0384(8)  |
| O5                                                                    | 0.7220(3)   | 0.500000   | 0.2609(4) | 0.0410(8)  |

**Table S3.** Selected bond lengths (Å) and angles (°) for  $\text{Rb}_2(\text{C}_4\text{O}_4)[\text{B}(\text{OH})_3]_2 \cdot 2\text{H}_2\text{O}$ .

| $\text{Rb}_2(\text{C}_4\text{O}_4)[\text{B}(\text{OH})_3]_2 \cdot 2\text{H}_2\text{O}$ |            |                      |            |
|----------------------------------------------------------------------------------------|------------|----------------------|------------|
| B(1)-O(3)                                                                              | 1.386(7)   | Rb(2)#1-O(1)         | 2.869(3)   |
| B(1)-O(4)                                                                              | 1.354(7)   | Rb(1)-O(2)           | 2.919(4)   |
| B(1)-O(5)                                                                              | 1.349(6)   | Rb(2)-O(2)           | 3.367(9)   |
| B(2)-O(6)                                                                              | 1.357(7)   | Rb(2)#1-O(2)         | 3.006(9)   |
| B(2)-O(7)                                                                              | 1.367(7)   | Rb(1)#2-O(3)         | 2.980(4)   |
| B(2)-O(8)                                                                              | 1.356(7)   | Rb(2)-O(4)           | 3.156(3)   |
| C(1)-C(2)                                                                              | 1.464(7)   | Rb(1)-O(6)           | 2.907(4)   |
| C(1)-C(4)                                                                              | 1.456(6)   | Rb(2)#1-O(6)         | 3.157(4)   |
| C(1)-O(9)                                                                              | 1.250(6)   | Rb(1)-O(8)           | 2.972(4)   |
| C(2)-C(3)                                                                              | 1.465(7)   | Rb(2)-O(8)           | 3.144(4)   |
| C(2)-O(10)                                                                             | 1.250(7)   | Rb(1)-O(9)           | 3.228(4)   |
| C(3)-C(4)                                                                              | 1.449(7)   | Rb(2)#1-O(9)         | 3.185(4)   |
| C(3)-O(11)                                                                             | 1.260(6)   | Rb(1)-O(10)          | 2.944(4)   |
| C(4)-O(12)                                                                             | 1.264(6)   | Rb(2)-O(10)          | 3.326(4)   |
| Rb(1)-O(1)                                                                             | 3.093(6)   | Rb(2)#3-O(11)        | 3.023(3)   |
| Rb(1)#1-O(1)                                                                           | 3.239(6)   | Rb(1)#4-O(12)        | 3.127(4)   |
| O(4)-B(1)-O(3)                                                                         | 114.9(4)   | O(12)#6-Rb(1)-O(9)   | 146.82(11) |
| O(5)-B(1)-O(3)                                                                         | 118.3(4)   | O(1)#5-Rb(2)-O(2)    | 98.16(15)  |
| O(5)-B(1)-O(4)                                                                         | 126.8(5)   | O(1)#5-Rb(2)-O(2)#5  | 99.58(16)  |
| O(6)-B(2)-O(7)                                                                         | 124.3(5)   | O(1)#5-Rb(2)-O(4)    | 131.64(10) |
| O(8)-B(2)-O(6)                                                                         | 116.3(5)   | O(1)#5-Rb(2)-O(6)#5  | 66.04(12)  |
| O(8)-B(2)-O(7)                                                                         | 119.4(5)   | O(1)#5-Rb(2)-O(8)    | 68.69(14)  |
| O(2)-Rb(1)-O(1)                                                                        | 96.5(2)    | O(1)#5-Rb(2)-O(9)#5  | 69.43(14)  |
| O(2)-Rb(1)-O(1)#5                                                                      | 100.06(19) | O(1)#5-Rb(2)-O(10)   | 67.81(12)  |
| O(2)-Rb(1)-O(3)#7                                                                      | 136.93(14) | O(1)#5-Rb(2)-O(11)#8 | 136.81(10) |
| O(2)-Rb(1)-O(8)                                                                        | 65.63(12)  | O(2)#5-Rb(2)-O(2)    | 147.83(8)  |
| O(2)-Rb(1)-O(9)                                                                        | 67.65(13)  | O(2)#5-Rb(2)-O(4)    | 73.85(11)  |
| O(2)-Rb(1)-O(10)                                                                       | 67.26(17)  | O(2)#5-Rb(2)-O(6)#5  | 59.93(11)  |
| O(2)-Rb(1)-O(12)#6                                                                     | 132.43(11) | O(2)#5-Rb(2)-O(8)    | 153.54(11) |
| O(3)#7-Rb(1)-O(1)#5                                                                    | 76.38(10)  | O(2)#5-Rb(2)-O(9)#5  | 67.25(11)  |
| O(3)#7-Rb(1)-O(1)                                                                      | 98.66(10)  | O(2)#5-Rb(2)-O(10)   | 105.14(10) |
| O(3)#7-Rb(1)-O(9)                                                                      | 82.22(11)  | O(2)#5-Rb(2)-O(11)#8 | 94.18(10)  |
| O(3)#7-Rb(1)-O(12)#6                                                                   | 89.32(10)  | O(4)-Rb(2)-O(2)      | 74.29(11)  |
| O(6)-Rb(1)-O(1)#5                                                                      | 111.68(11) | O(4)-Rb(2)-O(6)#5    | 69.88(11)  |
| O(6)-Rb(1)-O(1)                                                                        | 66.49(12)  | O(4)-Rb(2)-O(9)#5    | 138.90(11) |
| O(6)-Rb(1)-O(2)                                                                        | 63.86(16)  | O(4)-Rb(2)-O(10)     | 68.13(10)  |
| O(6)-Rb(1)-O(3)#7                                                                      | 157.73(13) | O(6)#5-Rb(2)-O(2)    | 104.39(10) |
| O(6)-Rb(1)-O(8)                                                                        | 46.13(11)  | O(6)#5-Rb(2)-O(9)#5  | 100.27(11) |
| O(6)-Rb(1)-O(9)                                                                        | 104.90(12) | O(6)#5-Rb(2)-O(10)   | 47.31(10)  |
| O(6)-Rb(1)-O(10)                                                                       | 130.26(11) | O(8)-Rb(2)-O(2)      | 58.61(11)  |

|                      |            |                      |            |
|----------------------|------------|----------------------|------------|
| O(6)-Rb(1)-O(12)#6   | 73.10(12)  | O(8)-Rb(2)-O(4)      | 131.95(11) |
| O(8)-Rb(1)-O(1)#5    | 66.23(10)  | O(8)-Rb(2)-O(6)#5    | 128.05(12) |
| O(8)-Rb(1)-O(1)      | 111.86(10) | O(8)-Rb(2)-O(9)#5    | 86.31(10)  |
| O(8)-Rb(1)-O(3)#7    | 140.30(12) | O(8)-Rb(2)-O(10)     | 92.52(10)  |
| O(8)-Rb(1)-O(9)      | 132.65(13) | O(9)#5-Rb(2)-O(2)    | 144.71(11) |
| O(8)-Rb(1)-O(12)#6   | 70.33(11)  | O(9)#5-Rb(2)-O(10)   | 134.37(12) |
| O(9)-Rb(1)-O(1)#5    | 130.60(10) | O(10)-Rb(2)-O(2)     | 58.04(10)  |
| O(10)-Rb(1)-O(1)#5   | 68.24(11)  | O(11)#8-Rb(2)-O(2)   | 90.96(9)   |
| O(10)-Rb(1)-O(1)     | 129.05(10) | O(11)#8-Rb(2)-O(4)   | 91.49(9)   |
| O(10)-Rb(1)-O(3)#7   | 71.89(13)  | O(11)#8-Rb(2)-O(6)#5 | 150.96(11) |
| O(10)-Rb(1)-O(8)     | 104.46(11) | O(11)#8-Rb(2)-O(8)   | 80.99(11)  |
| O(10)-Rb(1)-O(9)     | 62.89(10)  | O(11)#8-Rb(2)-O(9)#5 | 78.90(11)  |
| O(10)-Rb(1)-O(12)#6  | 143.55(12) | O(11)#8-Rb(2)-O(10)  | 145.92(10) |
| O(12)#6-Rb(1)-O(1)#5 | 77.24(9)   |                      |            |

---

Symmetry transformations used to generate equivalent atoms:

#1  $3/2-X, +Y, -1/2+Z$ ; #2  $+X, -1+Y, +Z$ ; #3  $-1/2+X, 1-Y, +Z$ ; #4  $-1/2+X, 2-Y, +Z$ ; #5  $3/2-X, +Y, 1/2+Z$ ;  
#6  $1/2+X, 2-Y, +Z$ ; #7  $+X, 1+Y, +Z$ ; #8  $1/2+X, 1-Y, +Z$ ;

**Table S4.** Selected bond lengths (Å) and angles (°) for Cs<sub>2</sub>(C<sub>4</sub>O<sub>4</sub>)[B(OH)<sub>3</sub>]<sub>2</sub>·2H<sub>2</sub>O.

| Cs <sub>2</sub> (C <sub>4</sub> O <sub>4</sub> )[B(OH) <sub>3</sub> ] <sub>2</sub> ·2H <sub>2</sub> O |            |                      |            |
|-------------------------------------------------------------------------------------------------------|------------|----------------------|------------|
| B(1)-O(6)                                                                                             | 1.355(6)   | Cs(1)-O(2)           | 3.150(3)   |
| B(1)-O(7)                                                                                             | 1.390(6)   | Cs(1)-O(3)           | 3.157(4)   |
| B(1)-O(8)                                                                                             | 1.347(6)   | Cs(1)-O(5)           | 3.068(4)   |
| B(2)-O(3)                                                                                             | 1.369(7)   | Cs(1)-O(7)           | 3.157(4)   |
| B(2)-O(4)                                                                                             | 1.352(7)   | Cs(1)-O(9)           | 3.257(3)   |
| B(2)-O(5)                                                                                             | 1.350(7)   | Cs(1)-O(11)#4        | 3.095(4)   |
| C(1)-C(2)                                                                                             | 1.450(6)   | Cs(1)-O(12)#4        | 3.348(4)   |
| C(1)-C(4)                                                                                             | 1.465(6)   | Cs(2)-O(1)#2         | 3.119(4)   |
| C(1)-O(9)                                                                                             | 1.263(5)   | Cs(2)-O(2)#2         | 3.346(8)   |
| C(2)-C(3)                                                                                             | 1.467(6)   | Cs(2)-O(2)#5         | 3.150(8)   |
| C(2)-O(10)                                                                                            | 1.255(6)   | Cs(2)-O(3)#2         | 3.257(4)   |
| C(3)-C(4)                                                                                             | 1.476(7)   | Cs(2)-O(5)#5         | 3.346(4)   |
| C(3)-O(11)                                                                                            | 1.241(6)   | Cs(2)-O(8)#7         | 3.295(3)   |
| C(4)-O(12)                                                                                            | 1.237(7)   | Cs(2)-O(10)#7        | 3.186(3)   |
| Cs(1)-O(1)                                                                                            | 3.240(6)   | Cs(2)-O(11)          | 3.430(4)   |
| Cs(1)-O(1)#3                                                                                          | 3.198(6)   | Cs(2)-O(12)#8        | 3.266(4)   |
| O(6)-B(1)-O(7)                                                                                        | 118.4(4)   | O(1)#2-Cs(2)-O(3)#2  | 68.03(13)  |
| O(8)-B(1)-O(6)                                                                                        | 126.5(5)   | O(1)#2-Cs(2)-O(5)#6  | 65.34(11)  |
| O(8)-B(1)-O(7)                                                                                        | 115.0(4)   | O(1)#2-Cs(2)-O(6)#7  | 77.54(10)  |
| O(4)-B(2)-O(3)                                                                                        | 115.3(5)   | O(1)#2-Cs(2)-O(8)#5  | 130.06(9)  |
| O(5)-B(2)-O(4)                                                                                        | 125.5(5)   | O(1)#2-Cs(2)-O(10)#5 | 140.48(9)  |
| O(1)#4-Cs(1)-O(1)                                                                                     | 156.38(11) | O(1)#2-Cs(2)-O(11)   | 66.58(11)  |
| O(1)-Cs(1)-O(9)                                                                                       | 75.01(10)  | O(1)#2-Cs(2)-O(12)#8 | 73.48(12)  |
| O(1)#4-Cs(1)-O(9)                                                                                     | 82.18(9)   | O(2)#6-Cs(2)-O(2)#2  | 145.82(6)  |
| O(1)#4-Cs(1)-O(12)#3                                                                                  | 71.43(9)   | O(2)#6-Cs(2)-O(3)#2  | 153.37(9)  |
| O(1)-Cs(1)-O(12)#3                                                                                    | 129.17(9)  | O(2)#6-Cs(2)-O(5)#6  | 61.01(9)   |
| O(2)-Cs(1)-O(1)                                                                                       | 99.73(16)  | O(2)#2-Cs(2)-O(5)#6  | 103.86(8)  |
| O(2)-Cs(1)-O(1)#4                                                                                     | 100.06(16) | O(2)#6-Cs(2)-O(6)#7  | 108.72(7)  |
| O(2)-Cs(1)-O(3)                                                                                       | 63.86(10)  | O(2)#2-Cs(2)-O(6)#7  | 102.63(8)  |
| O(2)-Cs(1)-O(7)                                                                                       | 137.92(10) | O(2)#6-Cs(2)-O(8)#5  | 71.69(9)   |
| O(2)-Cs(1)-O(9)                                                                                       | 132.02(8)  | O(2)#6-Cs(2)-O(10)#5 | 92.67(8)   |
| O(2)-Cs(1)-O(12)#3                                                                                    | 65.74(10)  | O(2)#2-Cs(2)-O(11)   | 59.45(8)   |
| O(3)-Cs(1)-O(1)                                                                                       | 67.87(10)  | O(2)#6-Cs(2)-O(11)   | 103.88(8)  |
| O(3)-Cs(1)-O(1)#4                                                                                     | 110.21(9)  | O(2)#6-Cs(2)-O(12)#8 | 66.74(9)   |
| O(3)-Cs(1)-O(9)                                                                                       | 70.43(10)  | O(3)#2-Cs(2)-O(2)#2  | 60.66(9)   |
| O(3)-Cs(1)-O(12)#3                                                                                    | 129.00(11) | O(3)#2-Cs(2)-O(5)#6  | 127.64(11) |
| O(5)-Cs(1)-O(1)                                                                                       | 110.20(10) | O(3)#2-Cs(2)-O(6)#7  | 46.10(8)   |
| O(5)-Cs(1)-O(1)#4                                                                                     | 67.82(10)  | O(3)#2-Cs(2)-O(8)#5  | 134.13(9)  |
| O(5)-Cs(1)-O(2)                                                                                       | 64.16(13)  | O(3)#2-Cs(2)-O(11)   | 94.52(9)   |
| O(5)-Cs(1)-O(3)                                                                                       | 43.31(11)  | O(3)#2-Cs(2)-O(12)#8 | 86.65(9)   |

|                       |            |                       |            |
|-----------------------|------------|-----------------------|------------|
| O(5)-Cs(1)-O(7)       | 157.74(11) | O(5)#6-Cs(2)-O(6)#7   | 136.68(10) |
| O(5)-Cs(1)-O(9)       | 73.06(11)  | O(5)#6-Cs(2)-O(11)    | 45.39(9)   |
| O(5)-Cs(1)-O(11)#3    | 128.27(12) | O(8)#5-Cs(2)-O(2)#2   | 74.23(8)   |
| O(5)-Cs(1)-O(12)#3    | 105.85(11) | O(8)#5-Cs(2)-O(5)#6   | 68.95(10)  |
| O(7)-Cs(1)-O(1)       | 73.31(9)   | O(8)#5-Cs(2)-O(6)#7   | 152.30(10) |
| O(7)-Cs(1)-O(1)#4     | 99.87(9)   | O(8)#5-Cs(2)-O(11)    | 67.43(10)  |
| O(7)-Cs(1)-O(3)       | 138.91(10) | O(10)#5-Cs(2)-O(2)#2  | 89.57(8)   |
| O(7)-Cs(1)-O(9)       | 87.26(9)   | O(10)#5-Cs(2)-O(3)#2  | 82.73(10)  |
| O(7)-Cs(1)-O(12)#3    | 86.35(10)  | O(10)#5-Cs(2)-O(5)#6  | 149.61(10) |
| O(9)-Cs(1)-O(12)#3    | 151.30(9)  | O(10)#5-Cs(2)-O(6)#7  | 62.97(9)   |
| O(11)#3-Cs(1)-O(1)#4  | 131.48(9)  | O(10)#5-Cs(2)-O(8)#5  | 89.36(9)   |
| O(11)#3-Cs(1)-O(1)    | 69.36(10)  | O(10)#5-Cs(2)-O(11)   | 144.71(10) |
| O(11)#3-Cs(1)-O(2)    | 65.11(14)  | O(10)#5-Cs(2)-O(12)#8 | 79.02(9)   |
| O(11)#3-Cs(1)-O(3)    | 103.58(10) | O(11)-Cs(2)-O(6)#7    | 135.41(10) |
| O(11)#3-Cs(1)-O(7)    | 73.90(11)  | O(12)#8-Cs(2)-O(2)#2  | 146.62(9)  |
| O(11)#3-Cs(1)-O(9)    | 143.12(10) | O(12)#8-Cs(2)-O(5)#6  | 101.54(9)  |
| O(11)#3-Cs(1)-O(12)#3 | 60.26(9)   | O(12)#8-Cs(2)-O(6)#7  | 44.31(8)   |
| O(1)#2-Cs(2)-O(2)#6   | 101.68(13) | O(12)#8-Cs(2)-O(8)#5  | 136.02(9)  |
| O(1)#2-Cs(2)-O(2)#2   | 98.00(11)  | O(12)#8-Cs(2)-O(11)   | 136.13(11) |

---

Symmetry transformations used to generate equivalent atoms:

#1  $1/2+X, 2-Y, +Z$ ; #2  $-1/2+X, 1-Y, +Z$ ; #3  $1/2+X, 1-Y, +Z$ ; #4  $3/2-X, +Y, 1/2+Z$ ; #5  $-1/2+X, 2-Y, +Z$ ;  
#6  $1-X, 1-Y, -1/2+Z$ ; #7  $-1+X, +Y, +Z$ ; #8  $1/2-X, +Y, -1/2+Z$ ;

**Table S5.** Selected bond lengths (Å) and angles (°) for Rb(C<sub>4</sub>O<sub>4</sub>)<sub>0.5</sub>·B(OH)<sub>3</sub>.

| Rb(C <sub>4</sub> O <sub>4</sub> ) <sub>0.5</sub> ·B(OH) <sub>3</sub> |           |                     |            |
|-----------------------------------------------------------------------|-----------|---------------------|------------|
| B(1)-O(1)                                                             | 1.356(5)  | Rb(1)#4-O(1)        | 2.977(2)   |
| B(1)-O(2)                                                             | 1.361(5)  | Rb(1)-O(3)          | 2.910(2)   |
| B(1)-O(3)                                                             | 1.365(5)  | Rb(1)#1-O(3)        | 2.910(2)   |
| C(1)-C(2)#2                                                           | 1.455(5)  | Rb(1)-O(4)          | 2.9289(19) |
| C(1)-C(2)                                                             | 1.455(5)  | Rb(1)#1-O(4)        | 2.9289(19) |
| C(1)-O(5)                                                             | 1.261(4)  | Rb(1)#5-O(5)        | 3.235(2)   |
| C(2)-O(4)                                                             | 1.255(4)  | Rb(1)#6-O(5)        | 3.235(2)   |
| Rb(1)#3-O(1)                                                          | 2.977(2)  |                     |            |
| O(1)-B(1)-O(2)                                                        | 121.4(4)  | O(3)-Rb(1)-O(4)     | 65.55(7)   |
| O(1)-B(1)-O(3)                                                        | 120.1(4)  | O(3)#1-Rb(1)-O(5)#8 | 157.61(8)  |
| O(2)-B(1)-O(3)                                                        | 118.6(4)  | O(3)-Rb(1)-O(5)#5   | 157.61(7)  |
| O(1)#3-Rb(1)-O(1)#7                                                   | 106.70(6) | O(3)-Rb(1)-O(5)#8   | 78.02(5)   |
| O(1)#7-Rb(1)-O(5)#8                                                   | 74.32(7)  | O(3)#1-Rb(1)-O(5)#5 | 78.02(5)   |
| O(1)#3-Rb(1)-O(5)#5                                                   | 74.32(7)  | O(4)#1-Rb(1)-O(1)#7 | 155.89(8)  |
| O(1)#7-Rb(1)-O(5)#5                                                   | 67.32(7)  | O(4)-Rb(1)-O(1)#3   | 155.89(8)  |
| O(1)#3-Rb(1)-O(5)#8                                                   | 67.32(7)  | O(4)-Rb(1)-O(1)#7   | 82.04(5)   |
| O(3)#1-Rb(1)-O(1)#3                                                   | 135.03(8) | O(4)#1-Rb(1)-O(1)#3 | 82.04(5)   |
| O(3)-Rb(1)-O(1)#7                                                     | 135.03(8) | O(4)#1-Rb(1)-O(4)   | 99.15(7)   |
| O(3)#1-Rb(1)-O(1)#7                                                   | 94.11(6)  | O(4)-Rb(1)-O(5)#8   | 94.63(6)   |
| O(3)-Rb(1)-O(1)#3                                                     | 94.11(7)  | O(4)#1-Rb(1)-O(5)#8 | 129.18(7)  |
| O(3)#1-Rb(1)-O(3)                                                     | 98.52(7)  | O(4)-Rb(1)-O(5)#5   | 129.18(7)  |
| O(3)-Rb(1)-O(4)#1                                                     | 64.37(7)  | O(4)#1-Rb(1)-O(5)#5 | 94.63(6)   |
| O(3)#1-Rb(1)-O(4)#1                                                   | 65.55(7)  | O(5)#5-Rb(1)-O(5)#8 | 113.35(5)  |
| O(3)#1-Rb(1)-O(4)                                                     | 64.37(7)  |                     |            |

Symmetry transformations used to generate equivalent atoms:

#1 1-X, 1-Y, 1-Z; #2 1-X, 1-Y, -Z; #3 1/2-X, 1.5-Y, 1-Z; #4 -1/2+X, -0.5+Y, +Z; #5 3/2-X, 3/2-Y, 1-Z;  
 #6 1/2+X, -1/2+Y, +Z; #7 1/2+X, 1/2+Y, +Z; #8 -1/2+X, 1/2+Y, +Z;

**Table S6.** Studies on reported borate-squarates.

| Compound                                                                                               | Space Group | Birefringence | Interlayer Distance (Å) | Dihedral Angle (°) | Anion Groups                                         | Refs.     |
|--------------------------------------------------------------------------------------------------------|-------------|---------------|-------------------------|--------------------|------------------------------------------------------|-----------|
| $\text{Na}_2\text{C}_4\text{O}_4(\text{H}_3\text{BO}_3)(\text{H}_2\text{O})\cdot\text{H}_3\text{BO}_3$ | $Cmc2_1$    | 0.26@1064 nm  | 3.481                   | 0                  | $[\text{B}(\text{OH})_3]$ , $[\text{C}_4\text{O}_4]$ | [1]       |
| $\text{Li}_2\text{C}_4\text{O}_4(\text{H}_3\text{BO}_3)(\text{H}_2\text{O})\cdot\text{H}_3\text{BO}_3$ | $Cmc2_1$    | 0.267@1064 nm | 3.301                   | 0                  | $[\text{B}(\text{OH})_3]$ , $[\text{C}_4\text{O}_4]$ | [2]       |
| $\text{K}(\text{C}_4\text{O}_4)_{0.5}\cdot\text{B}(\text{OH})_3$                                       | $p\bar{1}$  | 0.346@1064 nm | 3.310                   | 0                  | $[\text{B}(\text{OH})_3]$ , $[\text{C}_4\text{O}_4]$ | [3]       |
| $\text{Rb}_2(\text{C}_4\text{O}_4)[\text{B}(\text{OH})_3]_2\cdot 2\text{H}_2\text{O}$                  | $Pca2_1$    | 0.281@546 nm  | 3.384                   | 5.79               | $[\text{B}(\text{OH})_3]$ , $[\text{C}_4\text{O}_4]$ | This work |
| $\text{Cs}_2(\text{C}_4\text{O}_4)[\text{B}(\text{OH})_3]_2\cdot 2\text{H}_2\text{O}$                  | $Pca2_1$    | 0.262@546 nm  | 3.525                   | 11.91              | $[\text{B}(\text{OH})_3]$ , $[\text{C}_4\text{O}_4]$ | This work |
| $\text{Rb}(\text{C}_4\text{O}_4)_{0.5}\cdot\text{B}(\text{OH})_3$                                      | $C2/m$      | 0.328@546 nm  | 3.677                   | 0                  | $[\text{B}(\text{OH})_3]$ , $[\text{C}_4\text{O}_4]$ | This work |

**Table S7.** The assignments of the infrared absorption peaks for  $\text{Rb}_2(\text{C}_4\text{O}_4)[\text{B}(\text{OH})_3]_2\cdot 2\text{H}_2\text{O}$ ,  $\text{Cs}_2(\text{C}_4\text{O}_4)[\text{B}(\text{OH})_3]_2\cdot 2\text{H}_2\text{O}$ , and  $\text{Rb}(\text{C}_4\text{O}_4)_{0.5}\cdot\text{B}(\text{OH})_3$ .

| Assignments                                                   | Absorption bands for<br>$\text{Rb}_2(\text{C}_4\text{O}_4)[\text{B}(\text{OH})_3]_2\cdot 2\text{H}_2\text{O}$<br>( $\text{cm}^{-1}$ ) | Absorption bands for<br>$\text{Cs}_2(\text{C}_4\text{O}_4)[\text{B}(\text{OH})_3]_2\cdot 2\text{H}_2\text{O}$<br>( $\text{cm}^{-1}$ ) | Absorption bands for<br>$\text{Rb}(\text{C}_4\text{O}_4)_{0.5}\cdot\text{B}(\text{OH})_3$<br>( $\text{cm}^{-1}$ ) |
|---------------------------------------------------------------|---------------------------------------------------------------------------------------------------------------------------------------|---------------------------------------------------------------------------------------------------------------------------------------|-------------------------------------------------------------------------------------------------------------------|
| asymmetric stretching of H-O                                  | 3435/3277/2975                                                                                                                        | 3454/3323/2980                                                                                                                        | 3154/2965                                                                                                         |
| the bending of group H-O-H                                    | 1650                                                                                                                                  | 1645                                                                                                                                  | /                                                                                                                 |
| vibrations of C-C and C-O                                     | 1459                                                                                                                                  | 1461                                                                                                                                  | 1474/1423                                                                                                         |
| deformation vibration of C-C                                  | 1223/1152/1096                                                                                                                        | 1212/1136/1098                                                                                                                        | 1239/1173/1079                                                                                                    |
| symmetric stretching of B-O                                   | 876                                                                                                                                   | 870/798                                                                                                                               | 847                                                                                                               |
| out-of-plane bending of the<br>$[\text{BO}_3]^{3-}$ triangles | 753/662/540                                                                                                                           | 727/662/543                                                                                                                           | 702/674/550/526                                                                                                   |

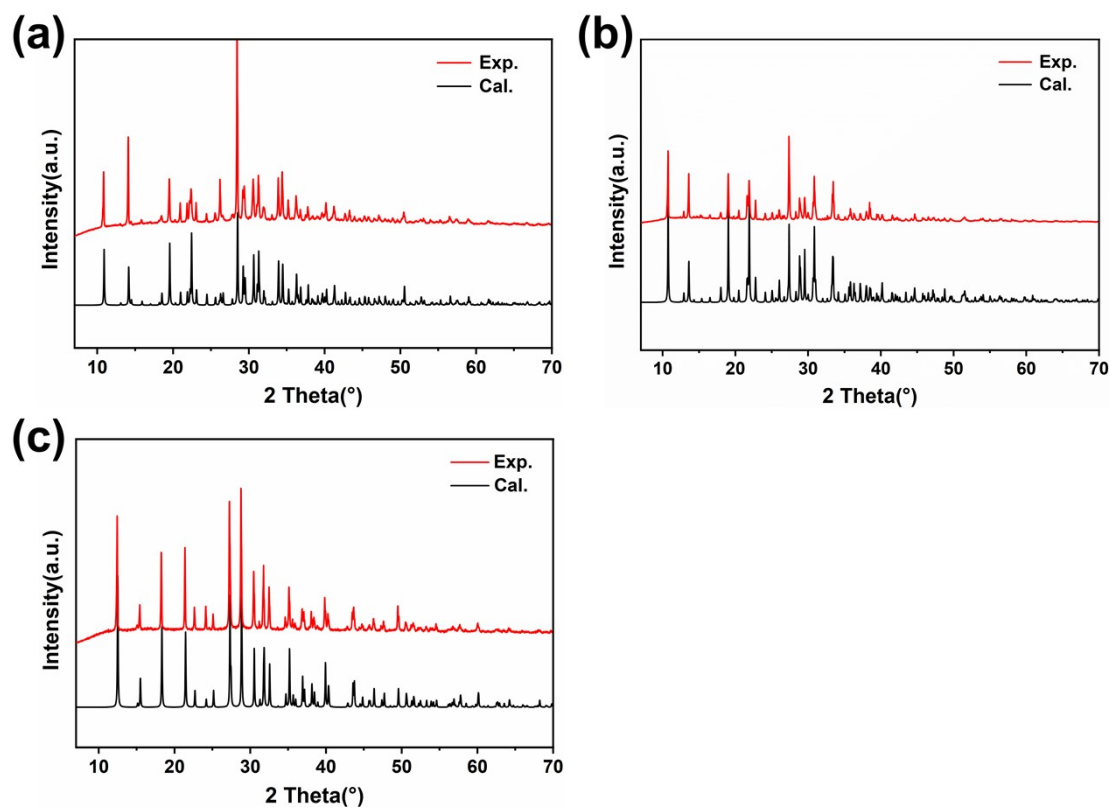

**Figure S1.** Powder XRD patterns of  $\text{Rb}_2(\text{C}_4\text{O}_4)[\text{B}(\text{OH})_3]_2 \cdot 2\text{H}_2\text{O}$  (a),  $\text{Cs}_2(\text{C}_4\text{O}_4)[\text{B}(\text{OH})_3]_2 \cdot 2\text{H}_2\text{O}$  (b), and  $\text{Rb}(\text{C}_4\text{O}_4)_{0.5} \cdot \text{B}(\text{OH})_3$  (c).

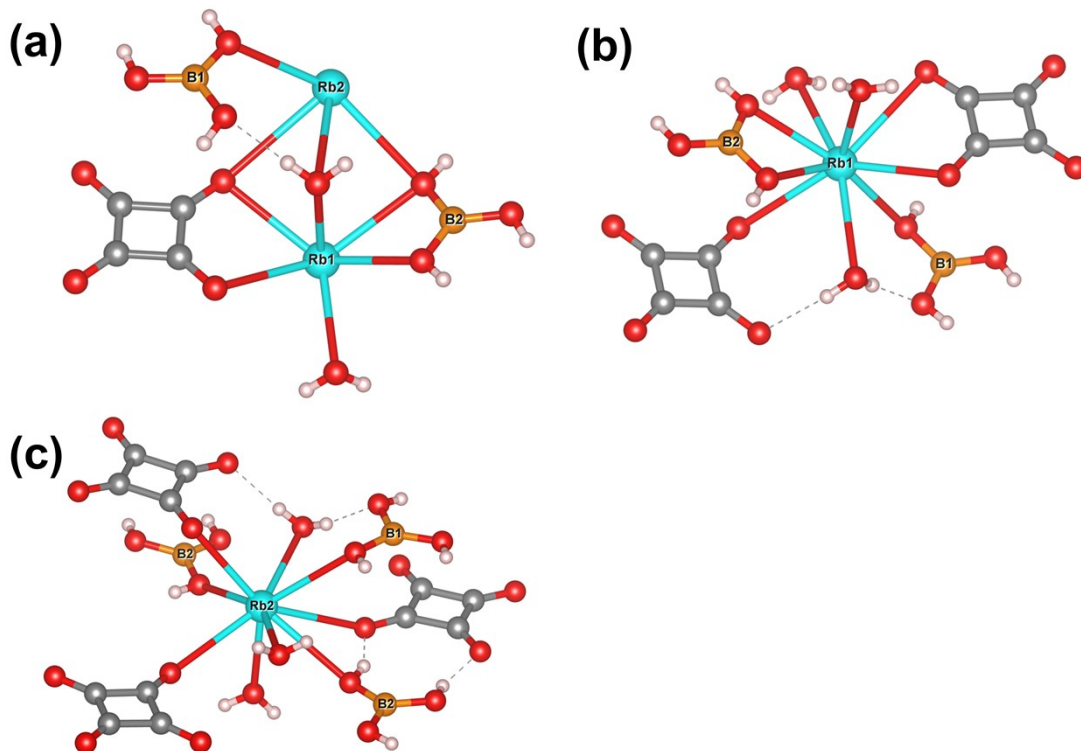

**Figure S2.** (a) View of asymmetric unit of  $\text{Rb}_2(\text{C}_4\text{O}_4)[\text{B}(\text{OH})_3]_2 \cdot 2\text{H}_2\text{O}$ ; The coordination of Rb1 (b) and Rb2 (c) atoms in  $\text{Rb}_2(\text{C}_4\text{O}_4)[\text{B}(\text{OH})_3]_2 \cdot 2\text{H}_2\text{O}$ .

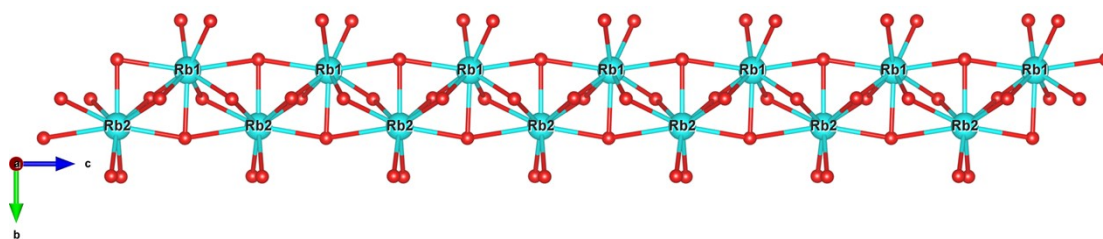

**Figure S3.** The one-dimensional  $[\text{Rb}-\text{O}]_\infty$  polyhedral chains in  $\text{Rb}_2(\text{C}_4\text{O}_4)[\text{B}(\text{OH})_3]_2 \cdot 2\text{H}_2\text{O}$ .

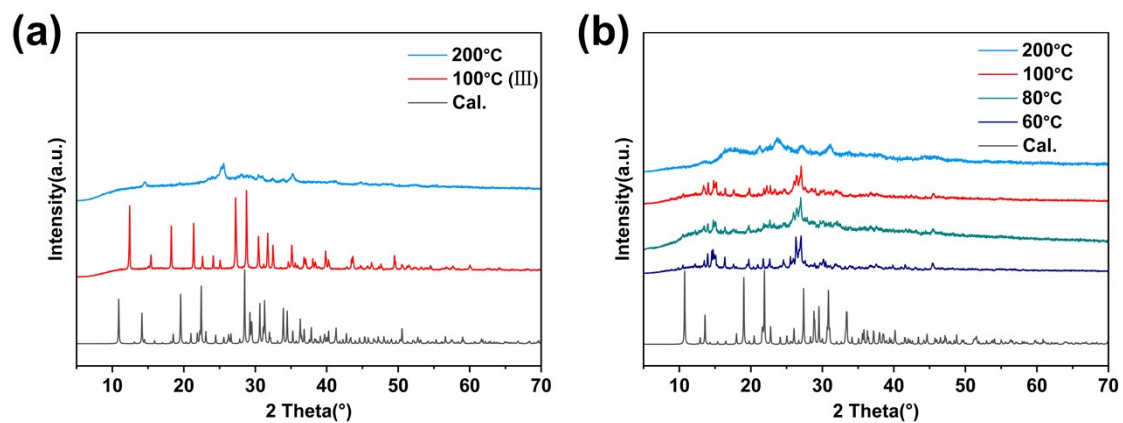

**Figure S4.** Powder XRD patterns of calcined polycrystalline samples of  $\text{Rb}_2(\text{C}_4\text{O}_4)[\text{B}(\text{OH})_3]_2 \cdot 2\text{H}_2\text{O}$  (a) and  $\text{Cs}_2(\text{C}_4\text{O}_4)[\text{B}(\text{OH})_3]_2 \cdot 2\text{H}_2\text{O}$  (b). Note: The theoretical XRD pattern of  $\text{Rb}(\text{C}_4\text{O}_4)_{0.5} \cdot \text{B}(\text{OH})_3$  matches the XRD pattern of  $\text{Rb}_2(\text{C}_4\text{O}_4)[\text{B}(\text{OH})_3]_2 \cdot 2\text{H}_2\text{O}$  after calcination at 100°C.

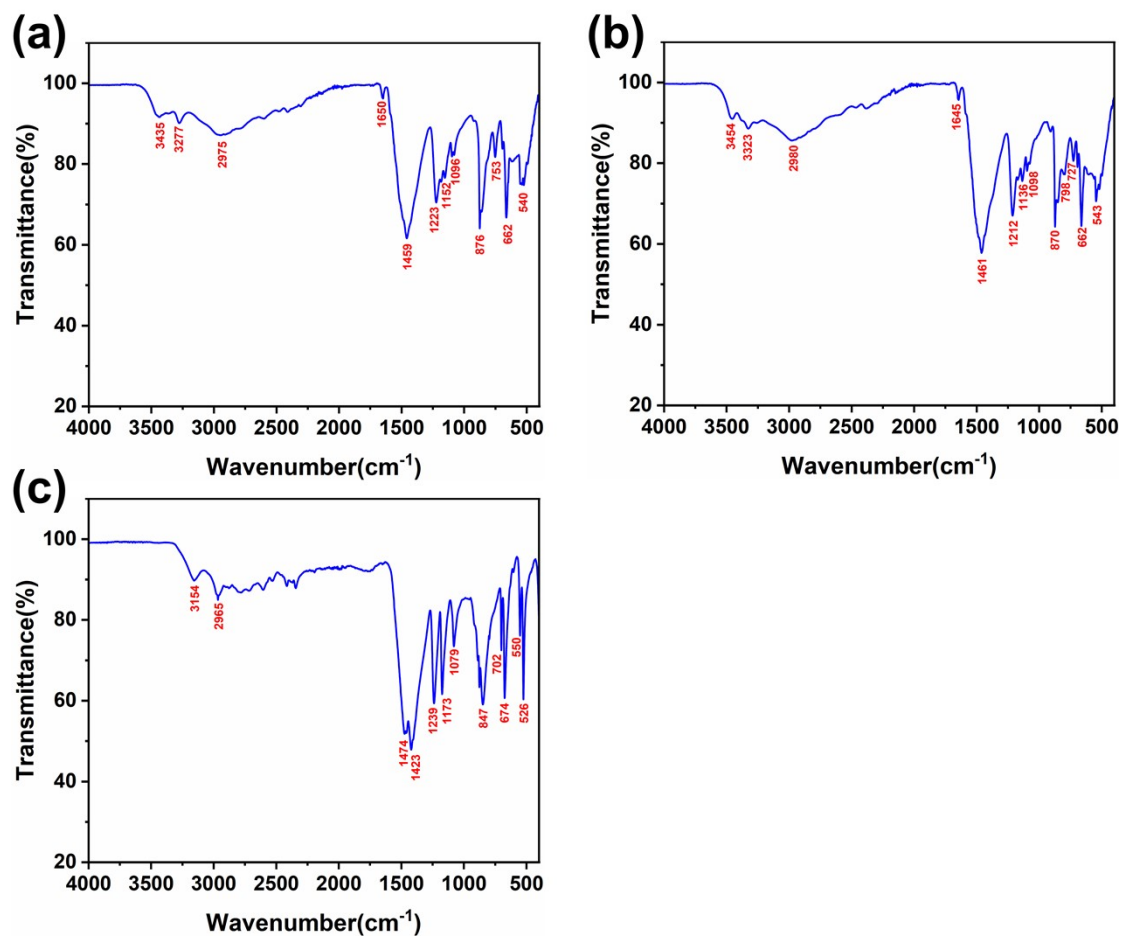

Figure S5. FT-IR spectra of  $\text{Rb}_2(\text{C}_4\text{O}_4)[\text{B}(\text{OH})_3]_2 \cdot 2\text{H}_2\text{O}$  (a),  $\text{Cs}_2(\text{C}_4\text{O}_4)[\text{B}(\text{OH})_3]_2 \cdot 2\text{H}_2\text{O}$  (b), and  $\text{Rb}(\text{C}_4\text{O}_4)_{0.5} \cdot \text{B}(\text{OH})_3$  (c).

## References

- [1] D. Yan, Y. Ma, H. Huang, B. Zhang, R.-L. Tang, L. Hu, F.-F. Mao, J. Zheng, X.-D. Zhang and S.-F. Li, *Chemical Communications*, 2023, **59**, 219-222.
- [2] Z. Xue, X. Wen, Y. Yan, J. Chen, Z. Hu, J. Wang, N. Ye and G. Peng, *Inorganic Chemistry*, 2025, **64**, 3637-3642.
- [3] X. Wang, T. Han, K. R. Poepelmeier, X. Hou, S. Pan and F. Zhang, *Chemical Communications*, 2024, **60**, 13566-13569.
